# Supplementary material for: Thermodynamically favored stable hydrogen storage reversibility of NaBH4 inside of bimetallic nanoporous carbon nanosheets
Source: Royal Society of Chemistry journal article supplement (doi:10.1039/d1ta10361j), 2022-01-01
Supplement: d1ta10361j1.pdf [file d1ta10361j1.pdf]

**Thermodynamically favored stable hydrogen storage reversibility of  
NaBH<sub>4</sub> inside of bimetallic nanoporous carbon nanosheets**

*Wei Chen<sup>a</sup>, Shunlong Ju<sup>a</sup>, Yahui Sun<sup>a</sup>, Tianren Zhang<sup>b</sup>, Juan Wang<sup>b</sup>, Jikai Ye<sup>a</sup>,  
Guanglin Xia<sup>\*a</sup>, Xuebin Yu<sup>\*a</sup>*

Department of Materials Science, Fudan University, Shanghai 200433, China.  
Zhejiang Tianneng Battery Co., Ltd., Changxing 313100, Zhejiang, China.

\*E-mail: [xiaguanglin@fudan.edu.cn](mailto:xiaguanglin@fudan.edu.cn) (G. L. Xia), [yuxuebin@fudan.edu.cn](mailto:yuxuebin@fudan.edu.cn) (X. B. Yu)

## Experimental

**Chemicals:**  $\text{Ni}(\text{NO}_3)_2 \cdot 6\text{H}_2\text{O}$ ,  $\text{Co}(\text{NO}_3)_2 \cdot 6\text{H}_2\text{O}$ , terephthalic acid (PTA), and dimethoxyethane (DME) were purchased from Aladdin Industrial Corporation. N, N-dimethylformamide (DMF) and ethanol were purchased from Sinopharm Chemical reagent Co., Ltd. Triethylamine (TEA) was purchased from Macklin Biochemical Co., Ltd.  $\text{NaBH}_4$  was purchased from Sigma-Aldrich. All chemicals were used directly without further purification.

**Synthesis of ultrathin NiCo-MOFs nanosheets (NiCo-MOFs):** The preparation process of ultrathin NiCo-MOFs nanosheets was modified according to the previously published method.<sup>S1, S2</sup> In a typical synthesis procedure, 0.75 mmol  $\text{Ni}(\text{NO}_3)_2 \cdot 6\text{H}_2\text{O}$ , 0.75 mmol  $\text{Co}(\text{NO}_3)_2 \cdot 6\text{H}_2\text{O}$  and 1.5 mmol PTA were dissolved in the mixed solvent mixture, containing 4 mL of ethanol, 4 mL of water and 64 mL of DMF. Subsequently, 1.6 mL TEA was quickly injected into the solution. After that, the mixture was stirred for 5 min to obtain a uniform colloidal suspension which was then continuously ultrasonicated for 8 h at room temperature. After washing with ethanol for 3 times, the as-obtained product was dispersed in water and ultrasonicated for 30 min. Finally, the obtained aqueous dispersion was subjected to freeze-drying for 72 h to obtain NiCo-MOFs.

**Synthesis of bimetallic (NiCo) nanoporous carbon nanosheets (NiCo-NC):** The NiCo-NC was prepared by the annealing of thus-obtained NiCo-MOFs at elevated temperature. Briefly, the as-prepared NiCo-MOFs was carbonized at 900 °C in a tube furnace for 1 h with a heating rate of 2 °C min<sup>-1</sup> under Ar atmosphere. After cooling to room temperature, the black powders collected were collected and denoted as NiCo-NC.

**Synthesis of  $\text{NaBH}_4$ @NiCo-NC:** The synthesis of  $\text{NaBH}_4$ @NiCo-NC was realized according to the solution infiltration method. Typically, 50 mg of  $\text{NaBH}_4$  was dissolved in 25 mL DME and stirred for 2h. Subsequently, 50 mg of NiCo-NC was added into the sol and the thus-obtained mixture was ultrasonically treated for 1 h to achieve the

homogeneous contact between NaBH<sub>4</sub> and NiCo-NC. The suspension was finally dried at 80 °C under vacuum for 12 h to remove the solvent to obtain NaBH<sub>4</sub>@NiCo-NC.

**Synthesis of nanoporous carbon nanosheets (NC):** NC was prepared by etching NiCo from NiCo-NC. Certain amount of NiCo-NC was dispersed in 8 mol L<sup>-1</sup> HCl solution and ultrasonicated for 1 h, followed by stirring for another 24 h. The product was washed with water for 4 times and dried in a drying oven at 80 °C for 12 h. The thus-obtained powder was denoted as NC.

**Synthesis of ball-milled samples:** The ball-milled composite of NaBH<sub>4</sub> and NiCo-NC (denoted as NaBH<sub>4</sub>/NiCo-NC) was prepared by ball milling the mixture of NaBH<sub>4</sub> and NiCo-NC with a weight ratio of 1:1 at 300 rpm for 2 h on a planetary ball mill (QM-3SP4, Nanjing Nanda Instrument Plant). The ball-to-powder ratio was approximately 50:1.

## Characterization

The hydrogen absorption and desorption performance of materials were quantitatively determined using a high-pressure gas sorption apparatus (HPSA-auto). Isothermal dehydrogenation measurements were conducted at several constant temperatures (*i.e.* 380 °C, 400 °C, 420 °C, and 440 °C) under static vacuum for 6 h. In the term of cycling hydrogen storage tests, the as-prepared materials were heated to 400 °C rapidly and hold for 6 h with an initial pressure lower than 0.001 bar, and the rehydrogenation of the dehydrogenated products was performed under a hydrogen pressure of 60 bar at 350 °C for 10 h.

Morphologies of the materials were observed by scanning electron microscopy (SEM, JEOL 7500FA) and transmission electron microscopy (TEM, JEOL JEM-2100F), while TEM-associated energy-dispersive X-ray spectroscopy (EDS) was used for elemental analysis. Phase compositions of the materials were identified by X-ray diffraction (XRD; D8 advance, Bruker AXS) with Cu K $\alpha$  radiation at 50 kV and 30 mA. In order to avoid any possible oxidation during XRD measurement, all materials were pre-sealed on sample stages with scotch tape in an Ar-filled glovebox. Mass spectrometry (MS) was conducted using a mass spectrometer (HIDEN, QIC-20) from

room temperature to 600 °C with a heating rate of 3 °C min<sup>-1</sup> under Ar flow. The signals at  $m/e = 2$  and 27 were recorded in order to detect H<sub>2</sub> and B<sub>2</sub>H<sub>6</sub>. Chemical bonds in the materials were examined by Fourier transform infrared spectroscopy (FT-IR, Bruker Tensor 27). X-ray photoelectron spectroscopy (XPS) was carried out on a Thermo Scientific K-Alpha+ with Al X-ray radiation source.

### **DFT calculations**

Density functional theory (DFT) calculations were carried out using projector-augmented wave (PAW) method as implemented in Vienna ab initio simulation package (VASP).<sup>S3-S5</sup> A generalized gradient approximation (GGA) of Perdew-Burke-Ernzerhof (PBE) functional was employed to describe the exchange-correlation interaction.<sup>S6</sup> The DFT-D3 method was also adopted to evaluate the van der Waals interactions.<sup>S7</sup> In all calculations, the energy cutoff was set as 500 eV, and Gamma centered k-points mesh with mesh point spacing less than 0.05 Å<sup>-1</sup> were applied. The structures were relaxed until the forces and total energy on all atoms were converged to less than 0.05 eV Å<sup>-1</sup> and 1 × 10<sup>-5</sup> eV. To evaluate the difficulty of various re-/dehydrogenation reactions thermodynamically, the Gibbs free energy change ( $\Delta G$ ) was calculated as follows,

$$\Delta G = \sum G_{product} - \sum G_{reactant}$$

where  $G_{product}$  and  $G_{reactant}$  are the total energy of every product and reactant in the re-/dehydrogenation reaction formula, respectively. A reaction with lower  $\Delta G$  is more likely to occur thermodynamically.

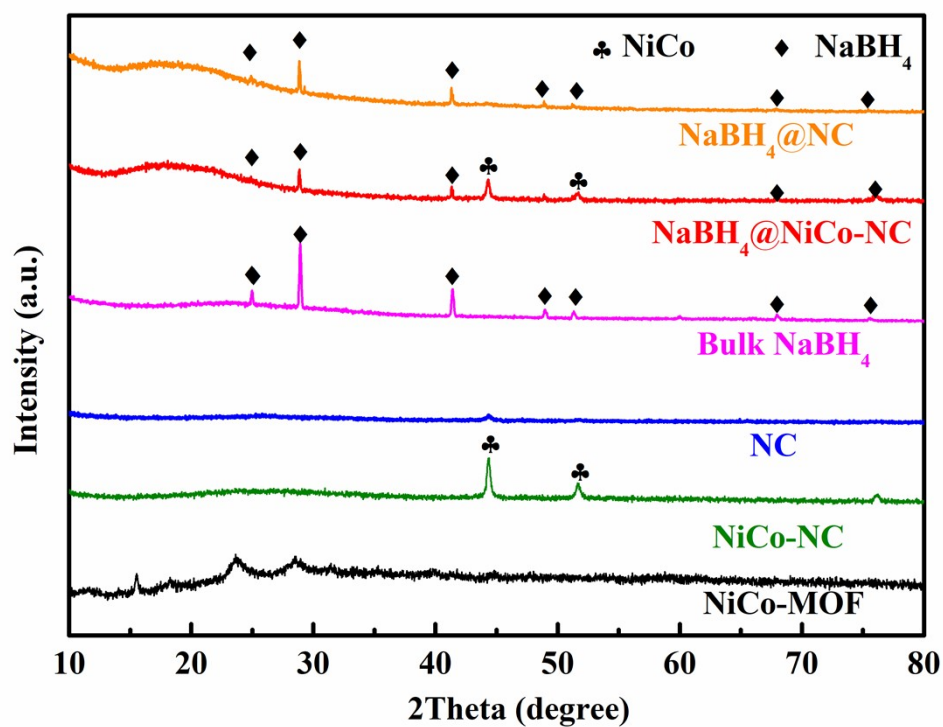

Figure S1. XRD patterns of the as-synthesized samples.

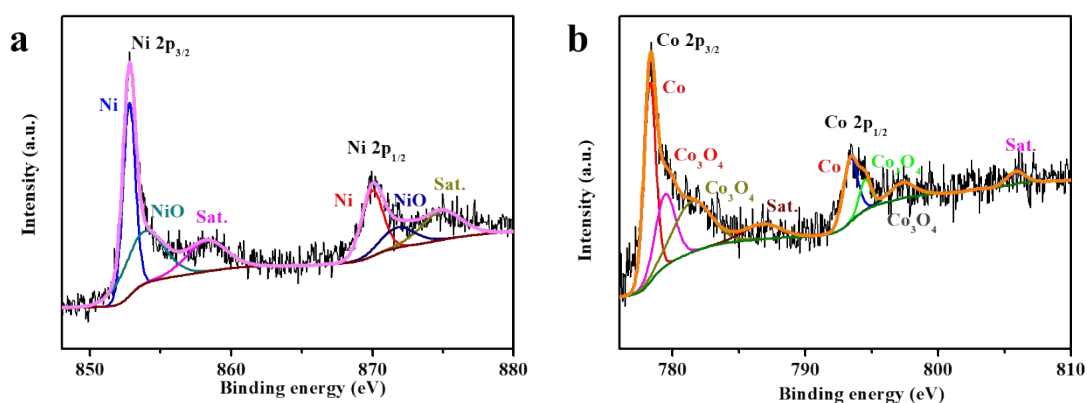

Figure S2. High-resolution Ni 2p (a) and Co 2p (b) XPS spectra of NiCo-NC.

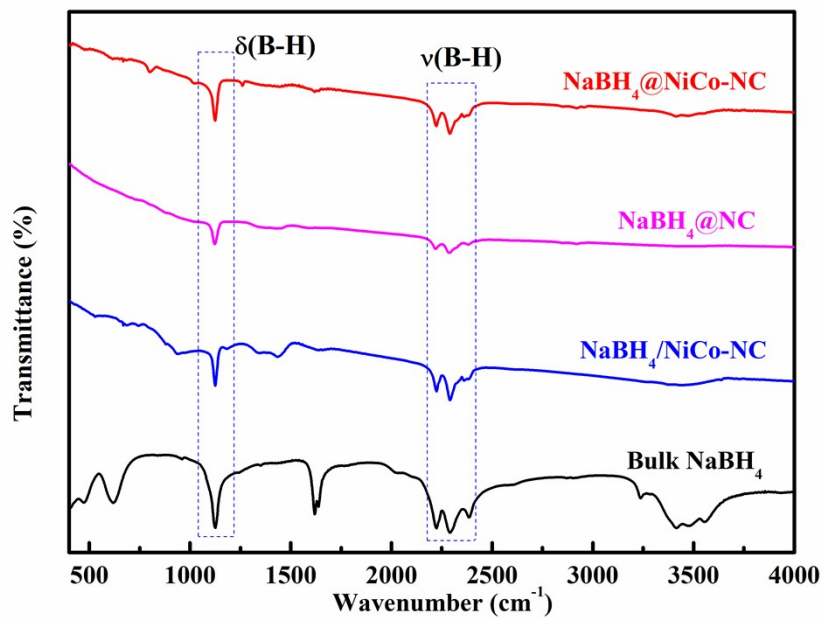

Figure S3. FTIR spectra of the as-prepared samples.

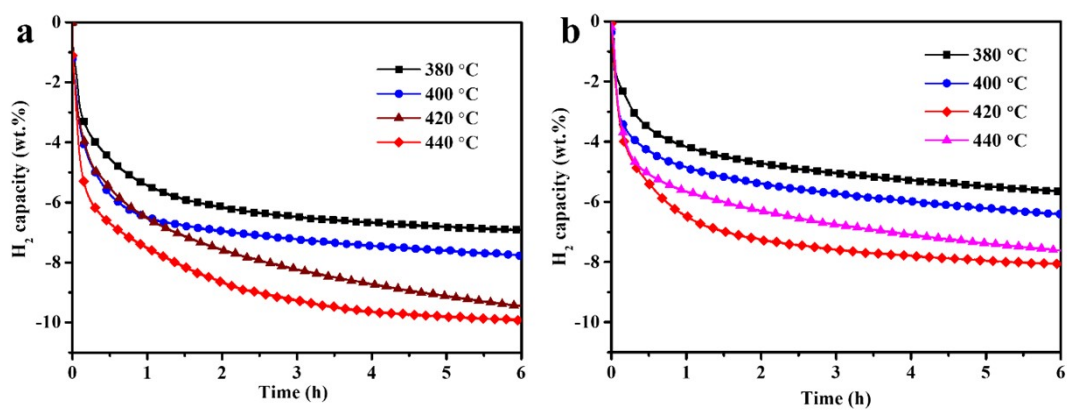

Figure S4. The isothermal dehydrogenation kinetics of (a) NaBH<sub>4</sub>@NC and (b) NaBH<sub>4</sub>/NiCo-NC at various temperatures.

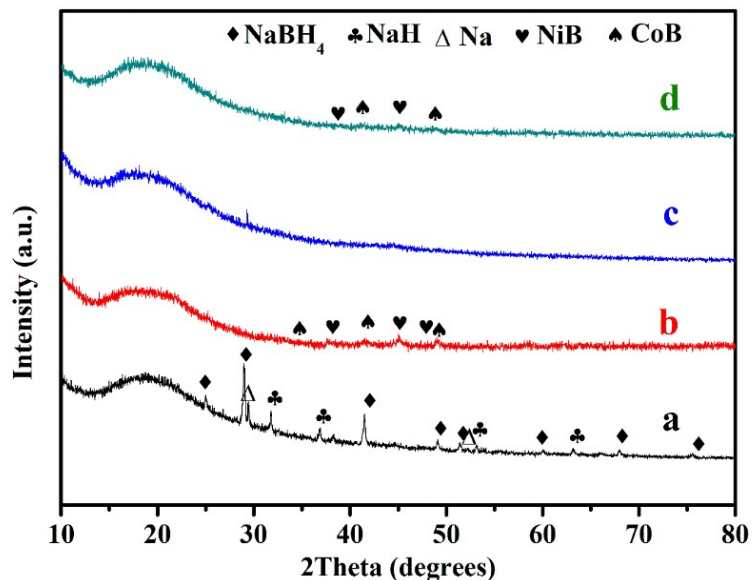

Figure S5. XRD patterns of the dehydrogenation products of (a) bulk  $\text{NaBH}_4$ , (b)  $\text{NaBH}_4/\text{NiCo-NC}$ , (c)  $\text{NaBH}_4@\text{NC}$  and (d)  $\text{NaBH}_4@\text{NiCo-NC}$ .

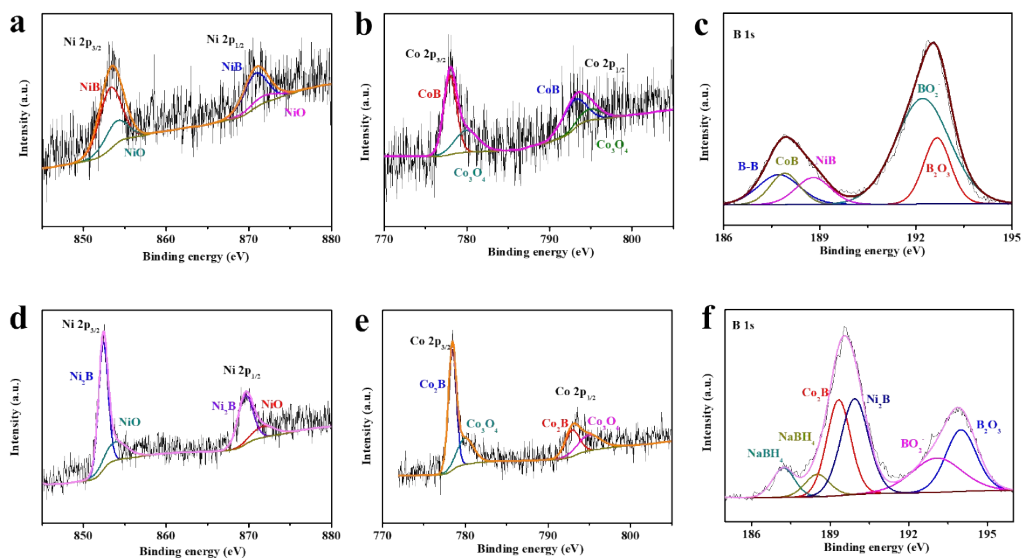

Figure S6. High-resolution Ni 2p, Co 2p, and B 1s XPS spectra of  $\text{NaBH}_4@\text{NiCo-NC}$  after the first cycle of dehydrogenation process (a, b, c) and the 2nd cycle of rehydrogenation process (d, e, f).

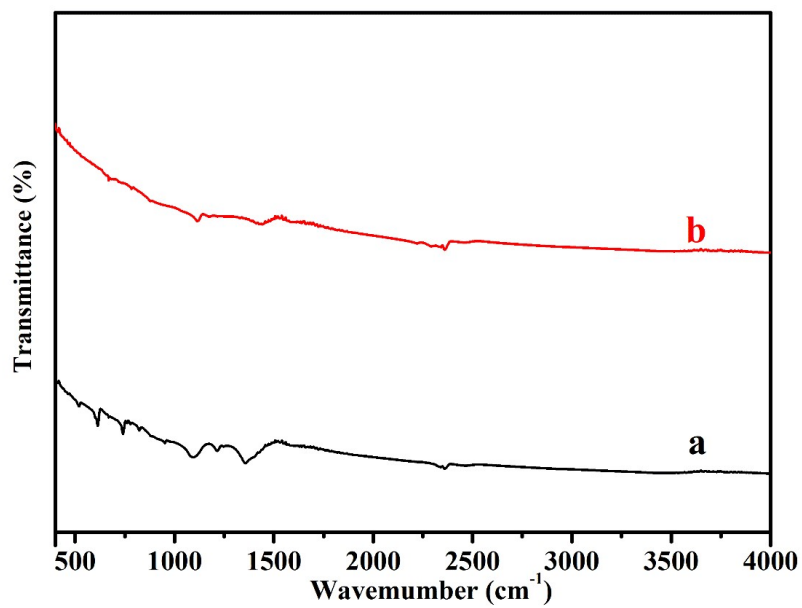

Figure S7. FTIR spectra of the dehydrogenation products of (a)  $\text{NaBH}_4/\text{NiCo-NC}$  and (b)  $\text{NaBH}_4@\text{NiCo-NC}$ .

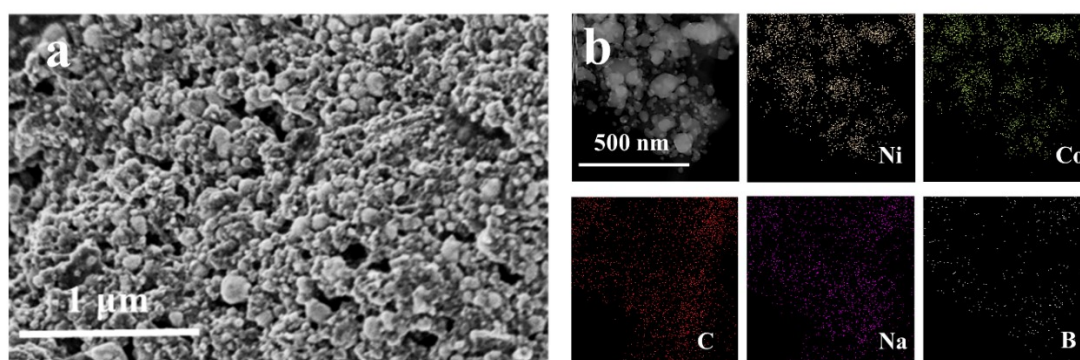

Figure S8. (a) SEM images and (b) STEM image and the corresponding EDS mapping of  $\text{NaBH}_4@\text{NiCo-NC}$  after the initial dehydrogenation process.



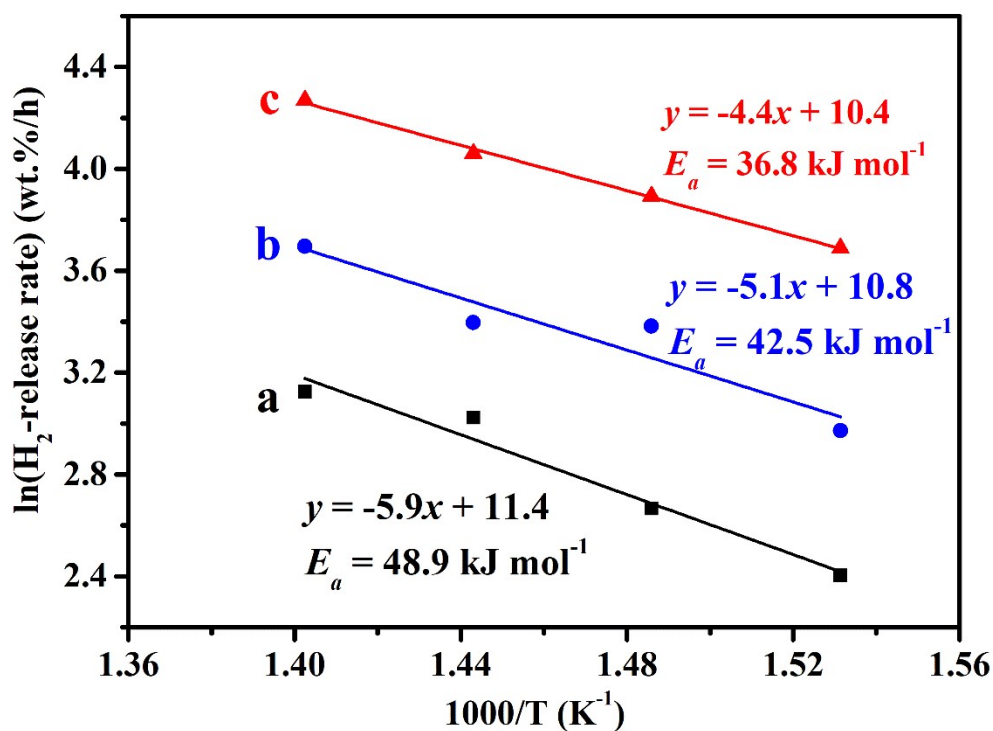

Figure S9. Arrhenius profiles of the dehydrogenation kinetics of (a) NaBH<sub>4</sub>@NC, (b) NaBH<sub>4</sub>/NiCo-NC, and (c) NaBH<sub>4</sub>@NiCo-NC.

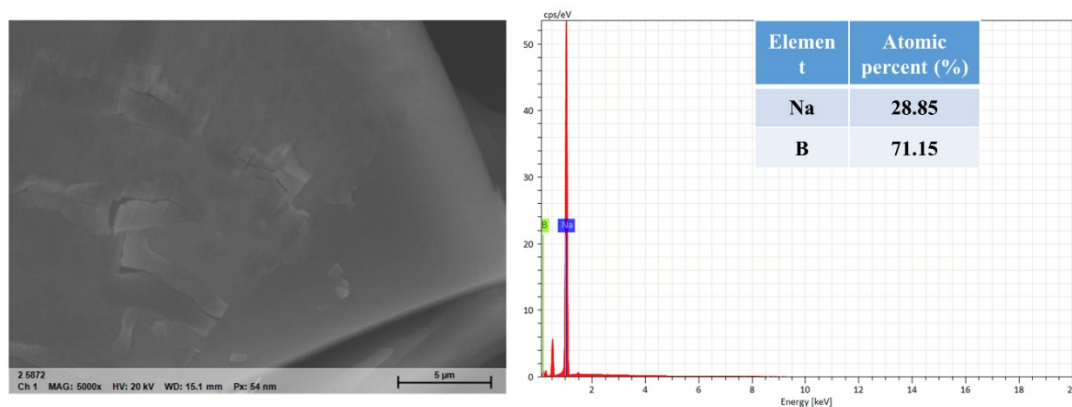

Figure S10. SEM image and the relative element content analysis of bulk NaBH<sub>4</sub> after the release of H<sub>2</sub> with a capacity of 9.0 wt.%.

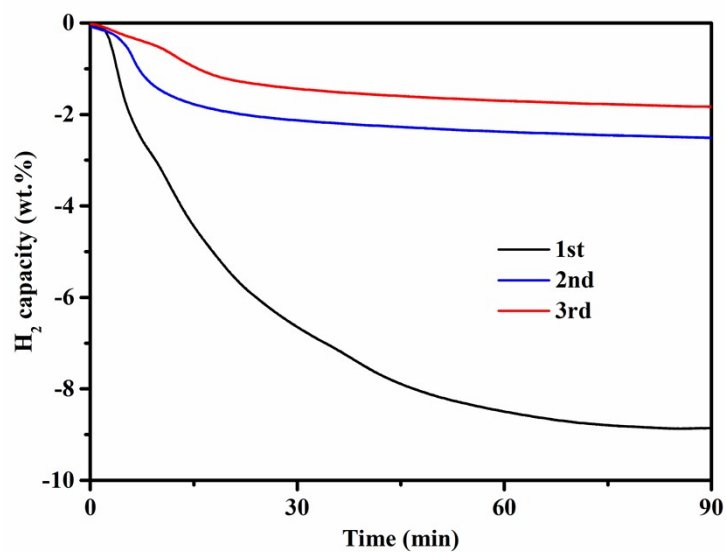

Figure S11. Cycling H<sub>2</sub> desorption performance of bulk NaBH<sub>4</sub> at 550 °C.

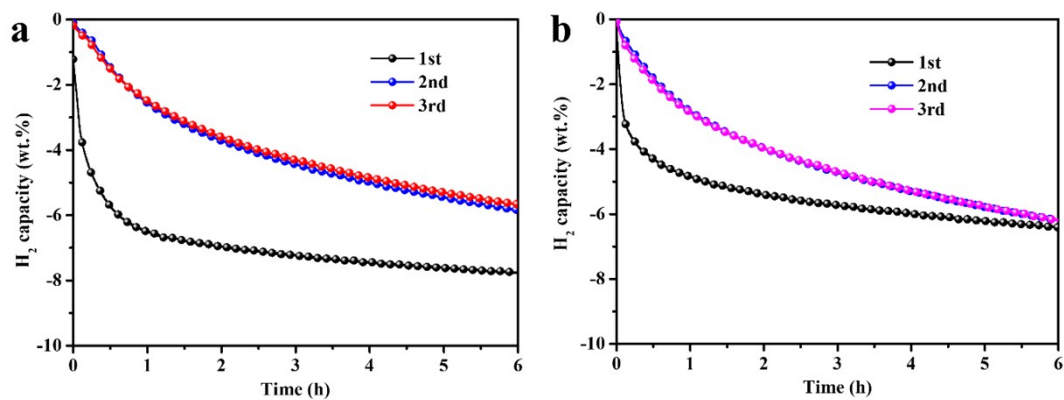

Figure S12. Cycling H<sub>2</sub> desorption performance of (a) NaBH<sub>4</sub>/NiCo-NC and (b) NaBH<sub>4</sub>@NC at 400 °C.

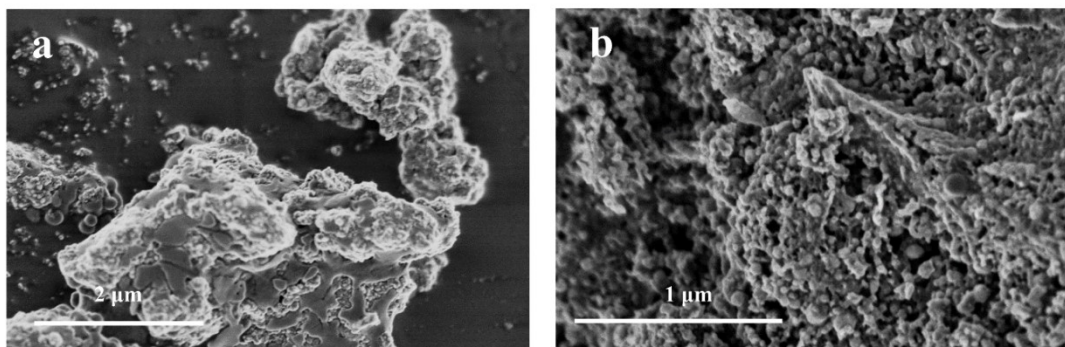

Figure S13. SEM images of the dehydrogenation product of (a)  $\text{NaBH}_4/\text{NiCo-NC}$  and (b)  $\text{NaBH}_4@\text{NC}$ .

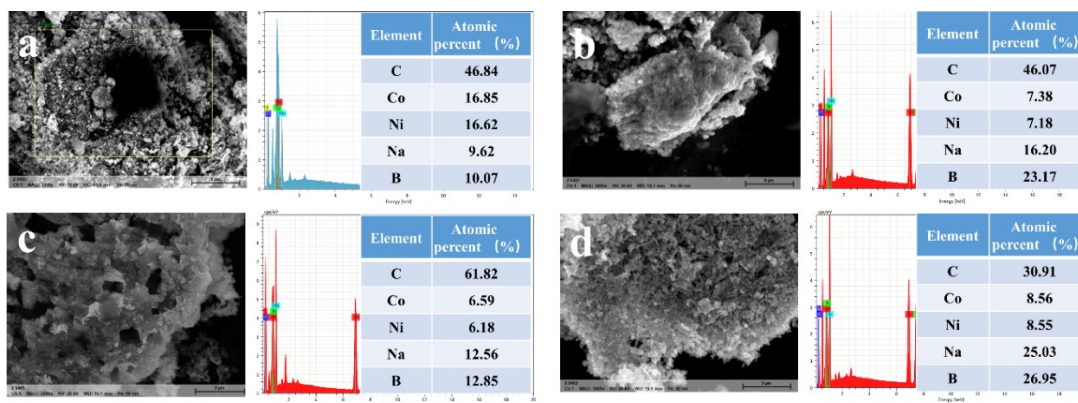

Figure S14. SEM images and the relative element content analysis of (a)  $\text{NaBH}_4/\text{NiCo-NC}$ , (c)  $\text{NaBH}_4@\text{NiCo-NC}$  and the dehydrogenation products of (b)  $\text{NaBH}_4@\text{NiCo-NC}$ , (d)  $\text{NaBH}_4/\text{NiCo-NC}$ .

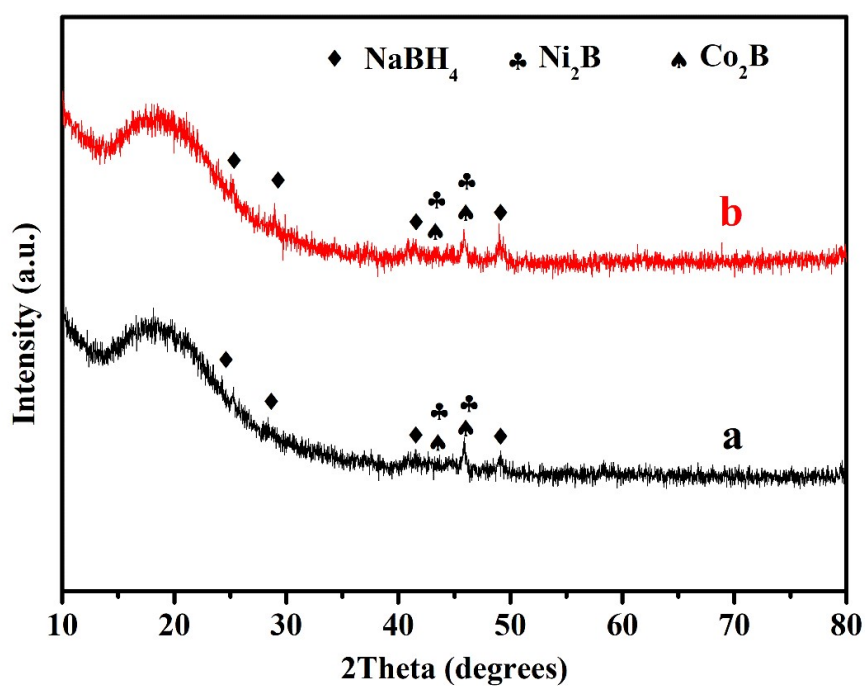

Figure S15. XRD patterns of the (a) NaBH<sub>4</sub>/NiCo-NC and (b) NaBH<sub>4</sub>@NiCo-NC after rehydrogenation.

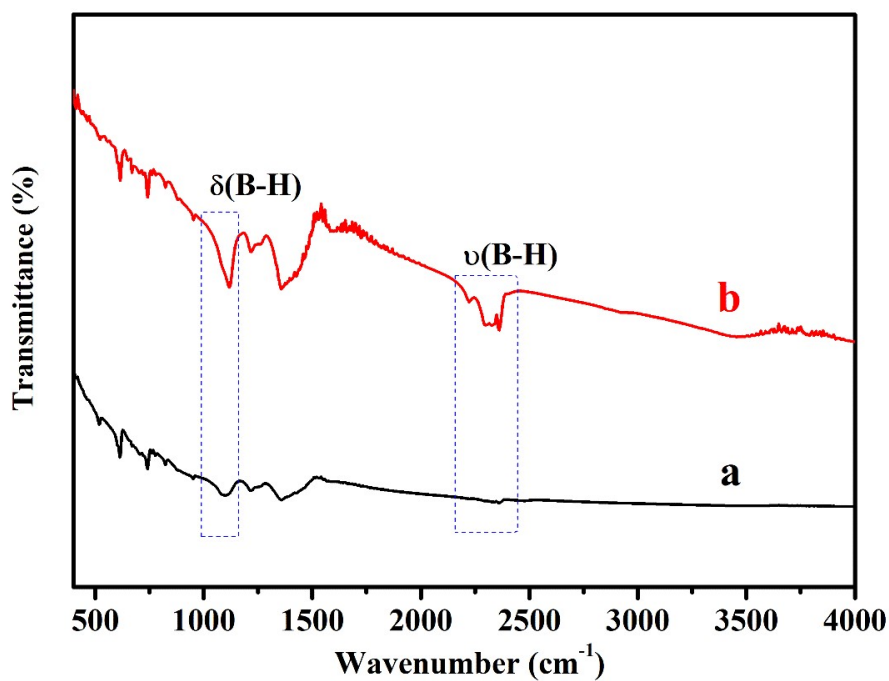

Figure S16. FTIR spectra of the (a) NaBH<sub>4</sub>/NiCo-NC and (b) NaBH<sub>4</sub>@NiCo-NC after rehydrogenation.

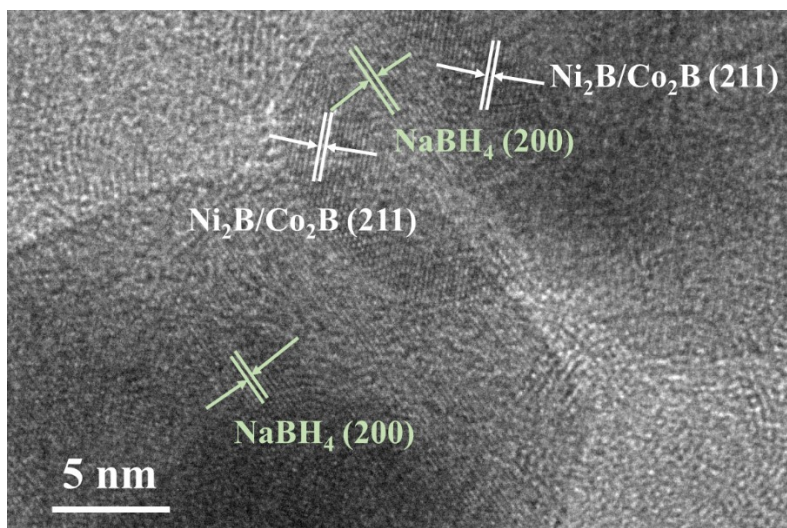

Figure S17 HRTEM image of  $\text{NaBH}_4@ \text{NiCo-NC}$  after rehydrogenation.

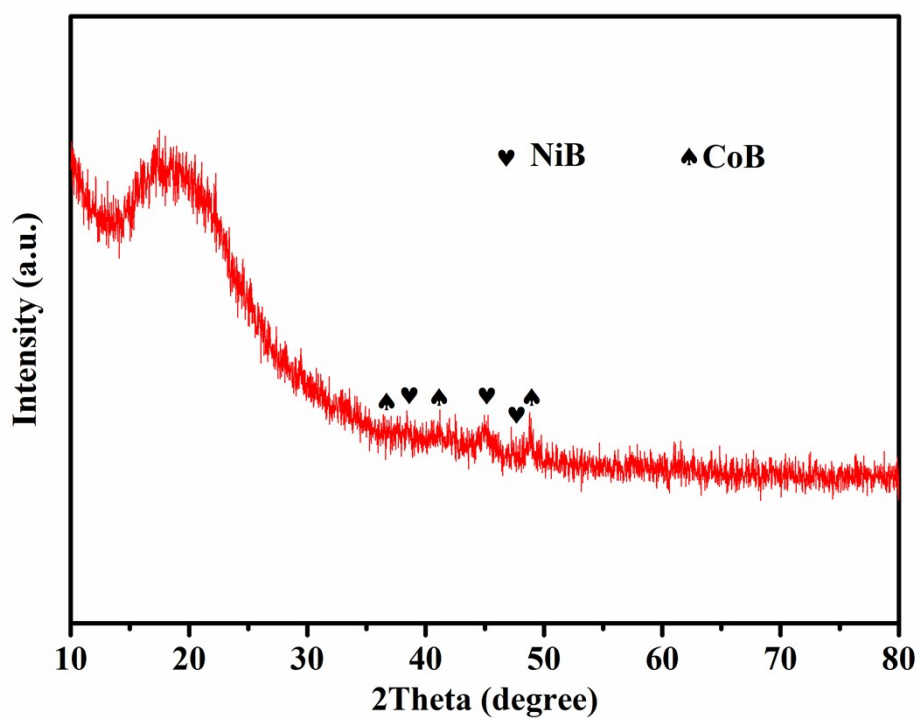

Figure S18. XRD patterns of  $\text{NaBH}_4@ \text{NiCo-NC}$  after the 2nd dehydrogenation.

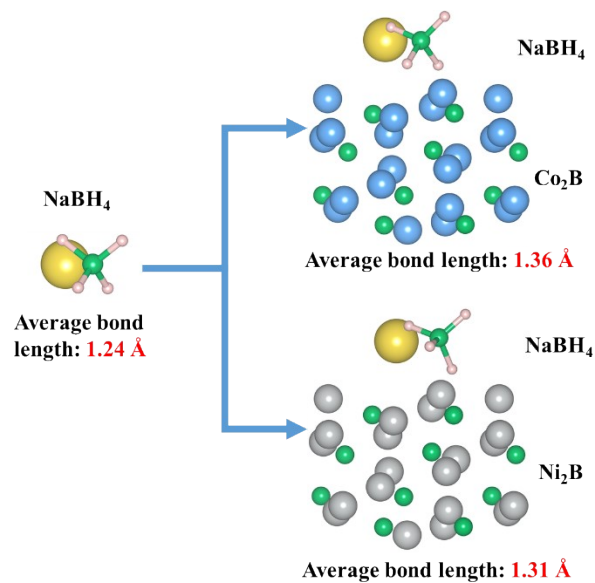

Figure S19. The optimized configurations of NaBH<sub>4</sub> molecule with and without the interaction of Co<sub>2</sub>B/Ni<sub>2</sub>B

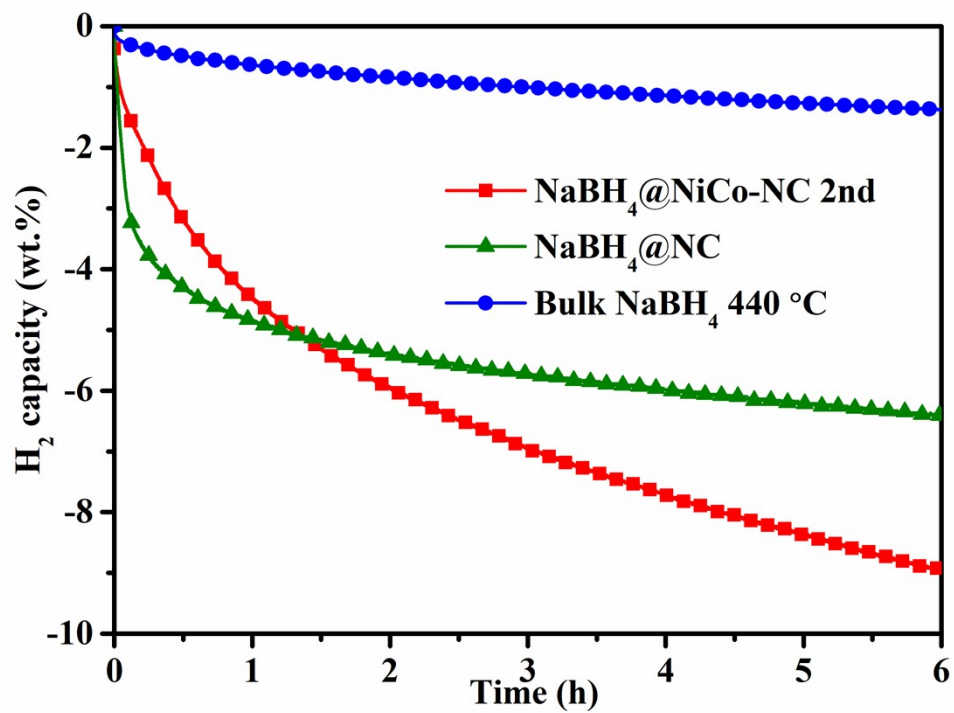

Figure S20. Isothermal H<sub>2</sub> desorption kinetics of NaBH<sub>4</sub>@NiCo-NC for the 2nd cycle at 400 °C, with the initial dehydrogenation kinetics of NaBH<sub>4</sub>@NC at 400 °C and bulk NaBH<sub>4</sub> at 440 °C included for comparison.

Table S1. The comparison of hydrogen storage performance of various nanoconfined  $\text{NaBH}_4$

| Scaffolds         | Peak temperature, ramping rate | Cycling performance                   | References |
|-------------------|--------------------------------|---------------------------------------|------------|
| Nanoporous carbon | 350 °C, 5 °C/min               | 43% of the initial capacity, 2 cycles | S8         |
| Graphene          | 400 °C, 3 °C/min               | ~7.0 wt%, 6 cycles                    | S9         |
| Ni coating        | 418 °C, 10 °C/min              | ~2.5 wt%, 5 cycles                    | S10        |
| Co coating        | 450 °C, 10 °C/min              | 0.3 wt.%, 2cycles                     | S11        |
| Fe coating        | ~460 °C, 10 °C/min             | 0.8 wt.%, 2cycles                     | S11        |
| Cu coating        | ~460 °C, 10 °C/min             | 0.1 wt.%, 2cycles                     | S11        |
| MCM-41            | 511 °C, 10 °C/min              | —                                     | S12        |
| Mesoporous silica | 400 °C, 2 °C/min               | —                                     | S13        |
| NiCo-NC           | 356 °C, 3 °C/min               | 4.5 wt.%, 5 cycles                    | This work  |

## References

- S1 S. L. Zhao, Y. Wang, J. C. Dong, C.-T. He, H. J. Yin, P. An, K. Zhao, X. F. Zhang, C. Gao, L. J. Zhang, J. W. Lv, J. X. Wang, J. Q. Zhang, A. M. Khattak, N. A. Khan, Z. X. Wei, J. Zhang, S. Q. Liu, H. J. Zhao and Z. Y. Tang, *Nat. Energy*, 2016, **1**, 16184.
- S2 Y. Z. Wang, Y. X. Liu, H. Q. Wang, W. Liu, Y. Li, J. F. Zhang, H. Hou and J. L. Yang, *ACS Appl. Energy Mater.*, 2019, **2**, 2063-2071.
- S3 G. Kresse and J. Hafner, *Phys. Rev. B*, 1993, **47**, 558-561.
- S4 G. Kresse and J. Furthmüller, *Phys. Rev. B*, 1996, **54**, 11169-11186.
- S5 P. E. Blöchl, *Phys. Rev. B*, 1994, **50**, 17953-17979.
- S6 J. P. Perdew, K. Burke and M. Ernzerhof, *Phys. Rev. Lett.*, 1996, **77**, 3865-3868.
- S7 S. Grimme, J. Antony, S. Ehrlich and H. Krieg, *J. Chem. Phys.*, 2010, **132**, 154104.
- S8 P. Ngene, R. V. D. Berg, M. H. W. Verkuijlen, K. P. de Jong and P. E. de Jongh, *Energ. Environ. Sci.*, 2011, **4**, 4108-4115.
- S9 L. N. Chong, X. Q. Zeng, W. J. Ding, D. J. Liu and J. X. Zou, *Adv. Mater.*, 2015, **27**, 5070–5074.
- S10 M. L. Christian and K. F. Aguey-Zinsou, *ACS nano*, 2012, **6**: 7739-7751.
- S11 M. L. Christian and K. F. Aguey-Zinsou, *Chem. Commun.*, 2013, **49**, 6794-6796.
- S12 X. Luo, A. Rawal and K. F. Aguey-Zinsou, *Inorganics*, 2021; **9**:2.
- S13 F. Perua, S. Garronia, R. Campesib, C. Milanese, A. Marinic, E. Pellicerd, M. D. Baród and G. Mulas, *J. Alloys Compd.*, 2013, **580**, 309-312.
